# Supplementary material
Source: publisher figshare collection journal article supplement (https://f1000.figshare.com/ndownloader/files/3571031)
Supplement: Supplementary file 1 [file 3571031]

Replicate	CONTROL	IGF-I	H2O2	I+H	CONTROL	IGF-I	H2O2	I+H
n1	1	0.402	0.051	0.068	0.985	0.317	0.033	0.167
n2	1	0.216	0.026	0.015	0.112	0.432	0.964	0.428
n3	1	0.787	0.069	0.048	1.253	0.826	1.176	0.557
n4	1	0.354	0.234	0.082	0.161	0.148	0.172	0.28
n5	1	0.663	0.16	0.141	0.418	0.445	0.372	0.191
n6	1	0.856	0.018	0.11	0.47	0.223	0.239	0.149
MEAN	1	0.546	0.093	0.077	0.566	0.398	0.493	0.295
SEM	0	0.105	0.035	0.018	0.187	0.098	0.19	0.067
